# Supplementary material for: The Ndc80 complex uses a tripartite attachment point to couple microtubule depolymerization to chromosome movement
Source: PubMed Central journal article supplement — Mol Biol Cell. 2011 Apr 15;22(8):1217–26. doi: 10.1091/mbc.E10-07-0626 (PMC3078066; doi:10.1091/mbc.e10-07-0626), 2011-04-15
Supplement: E10-07-0626_1.pdf [file E10-07-0626_1.pdf]

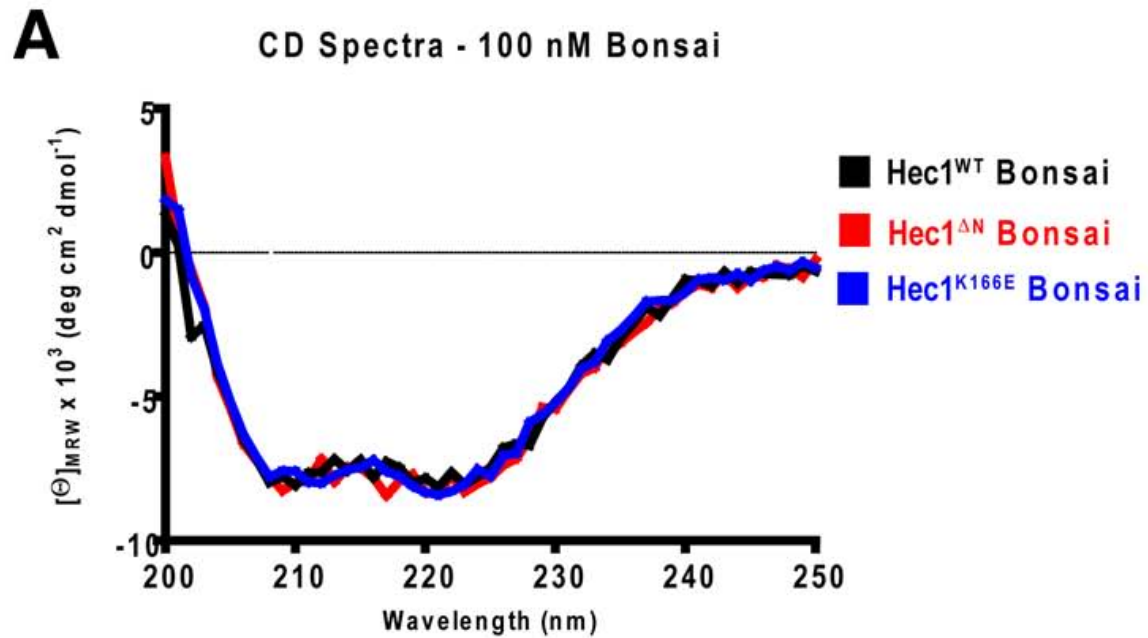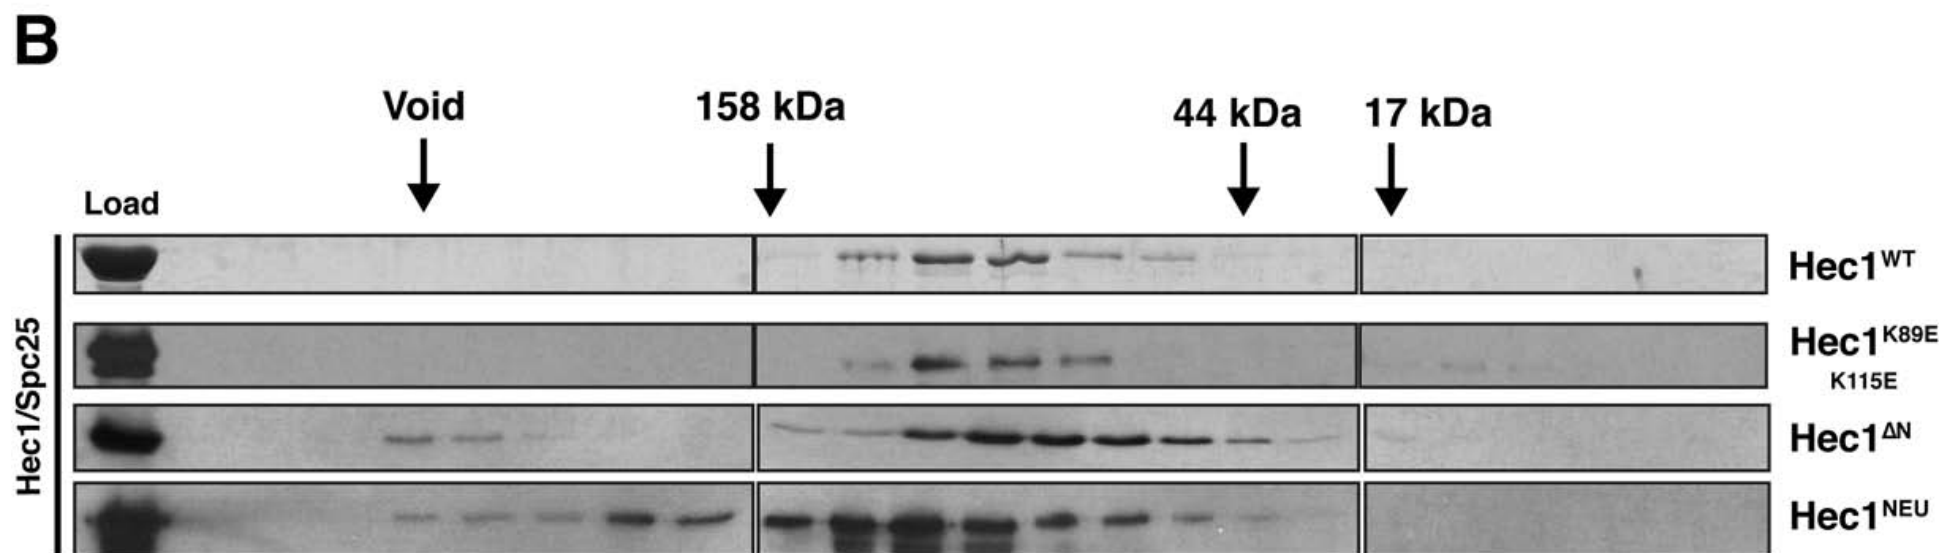

Supplemental Figure 1

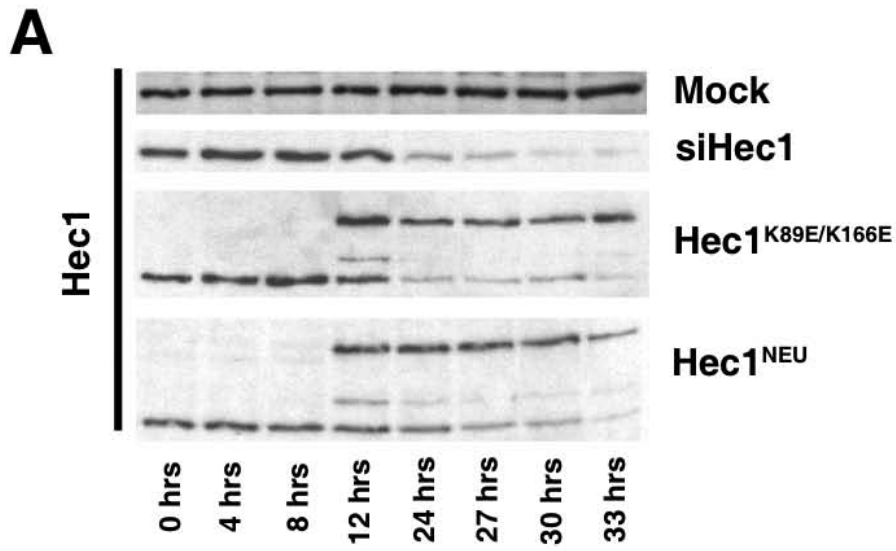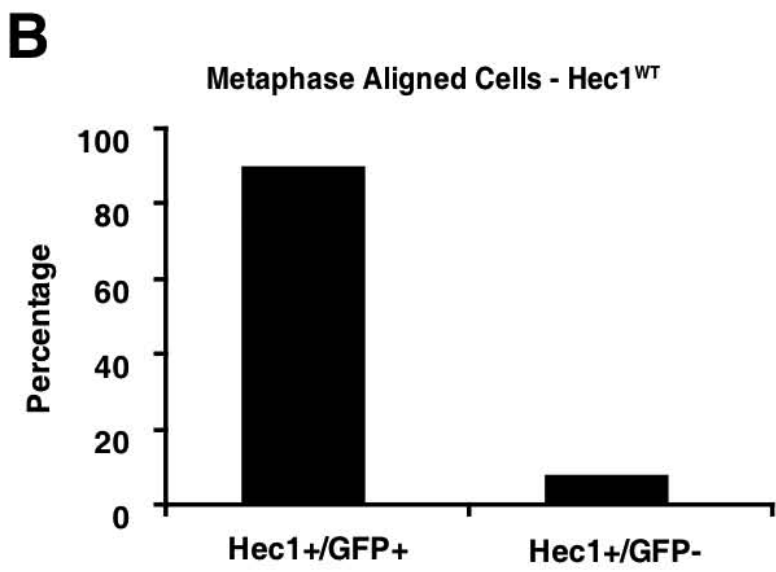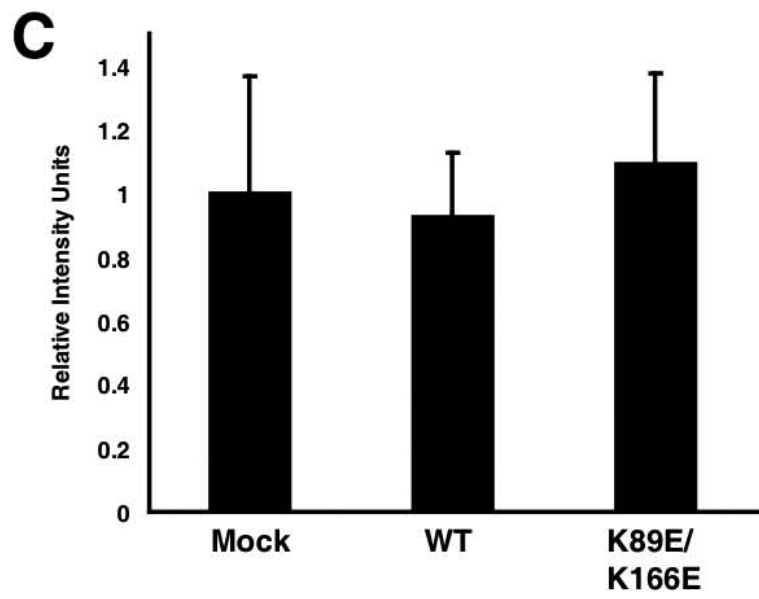

Supplemental Figure 2

**A**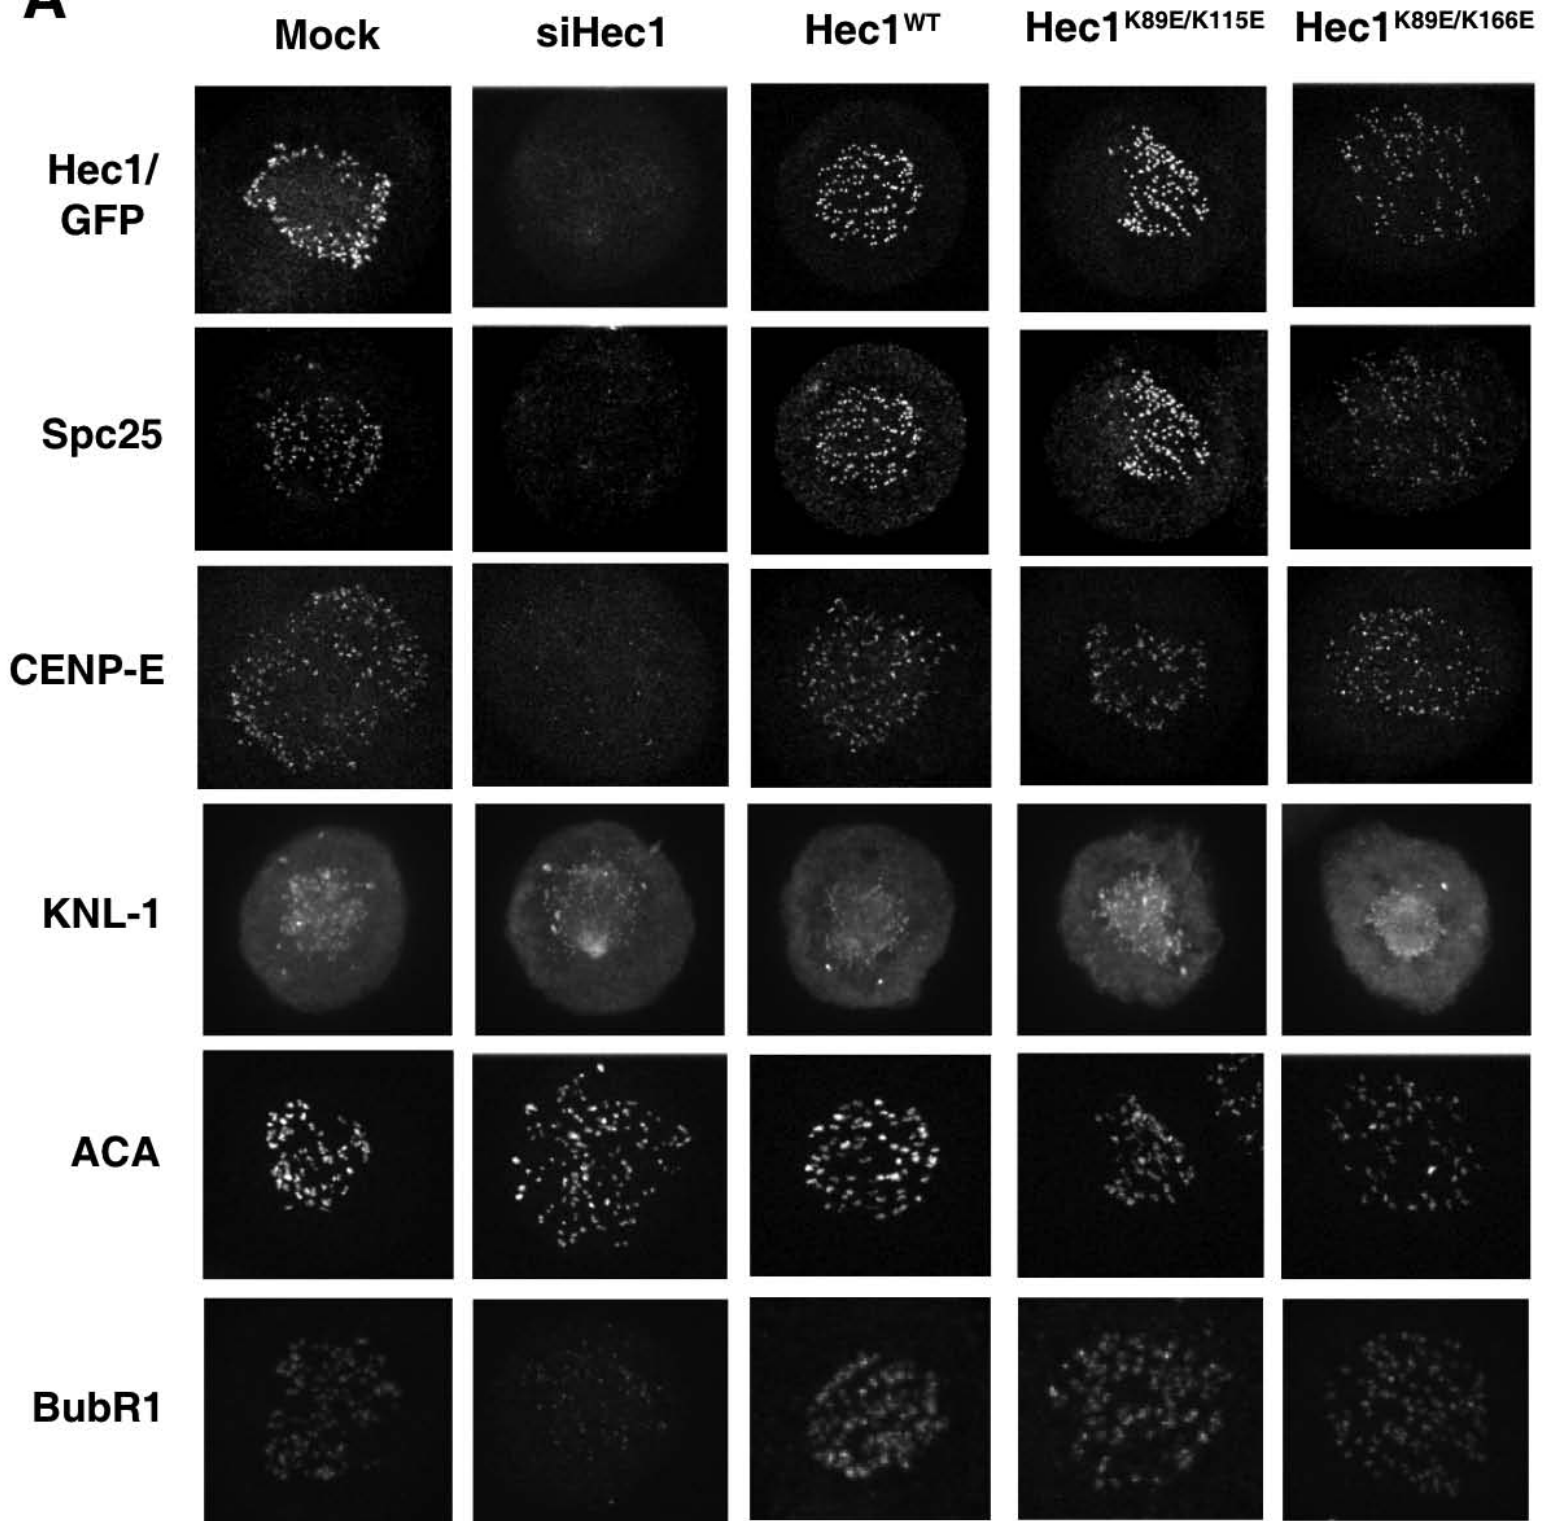

Supplemental Figure 3

**A**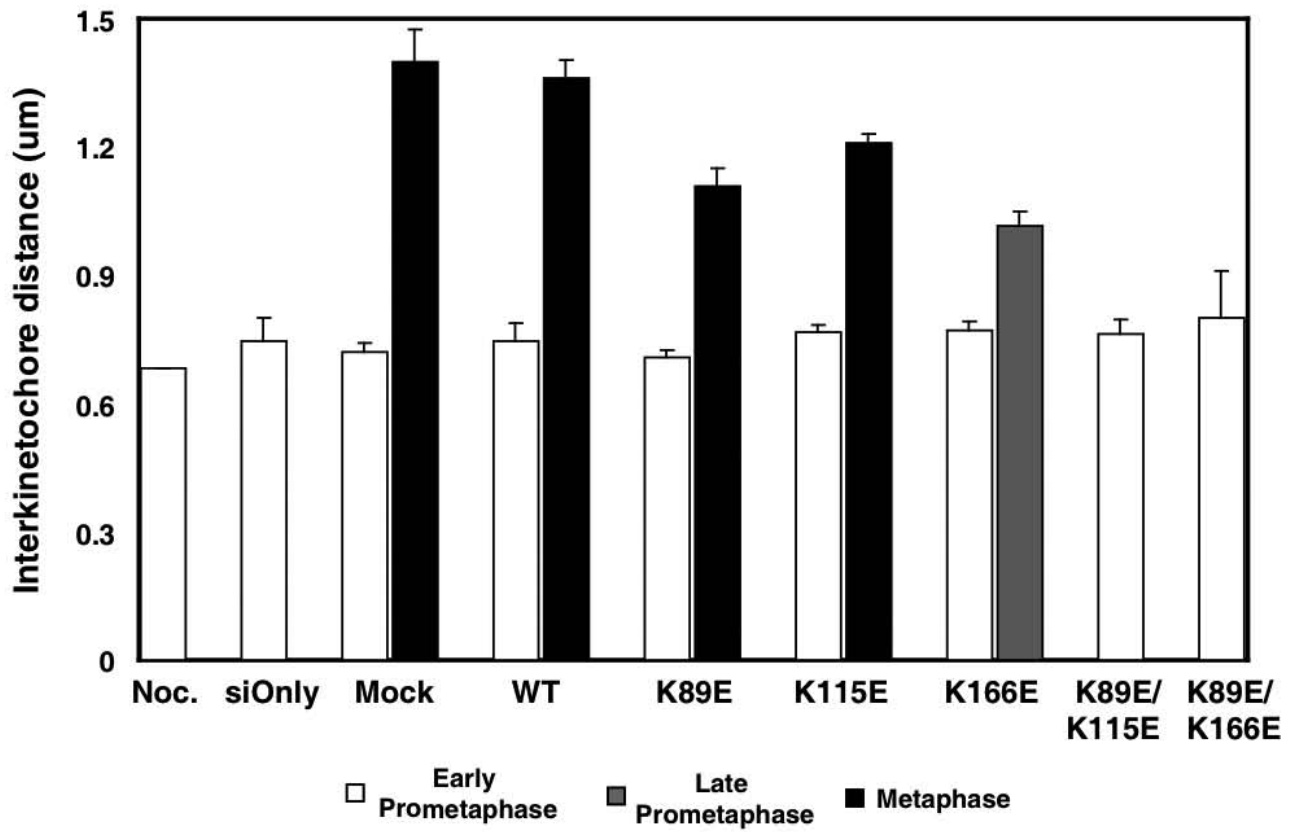**B**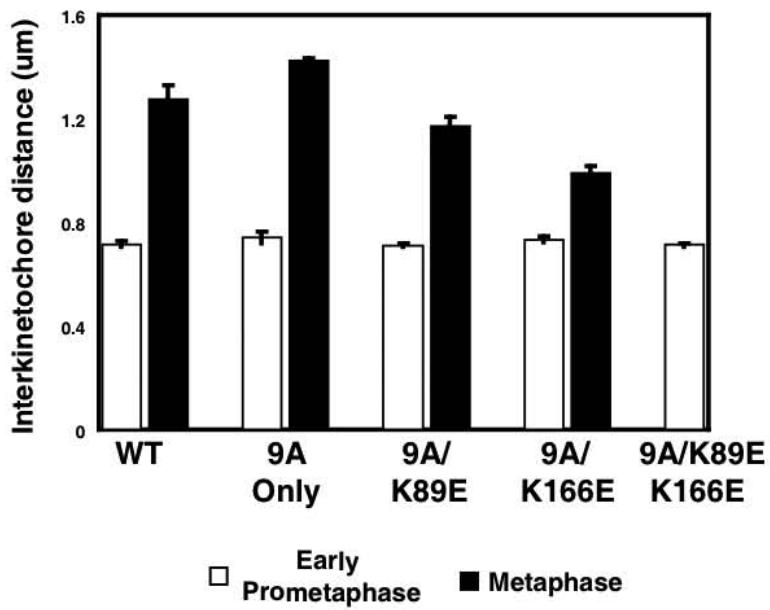**C**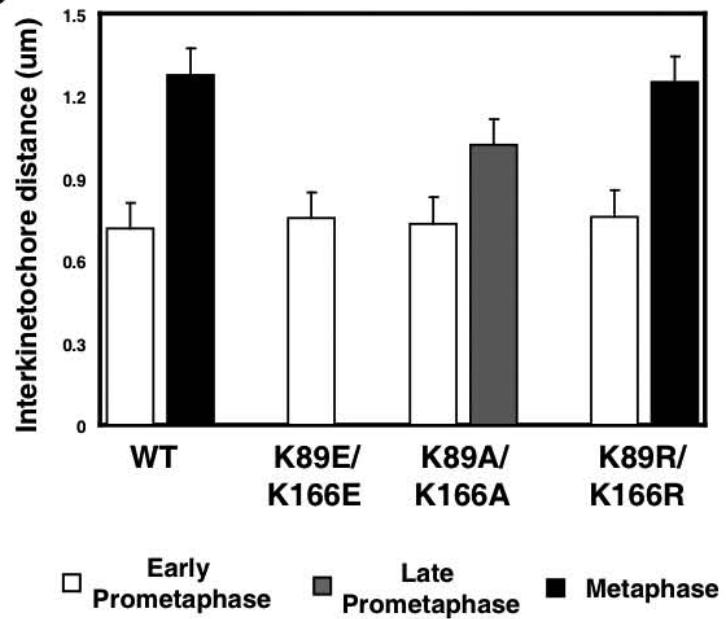

Supplemental Figure 4

**A**

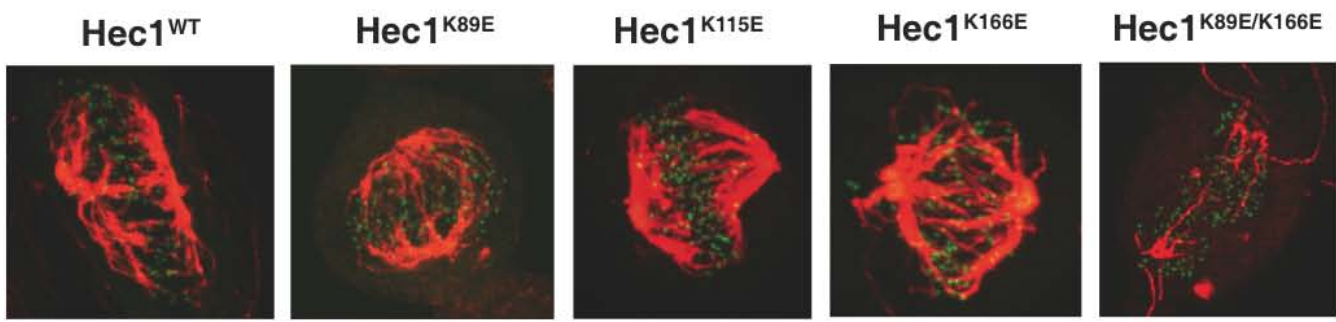

**Supplemental Figure 5**

**A**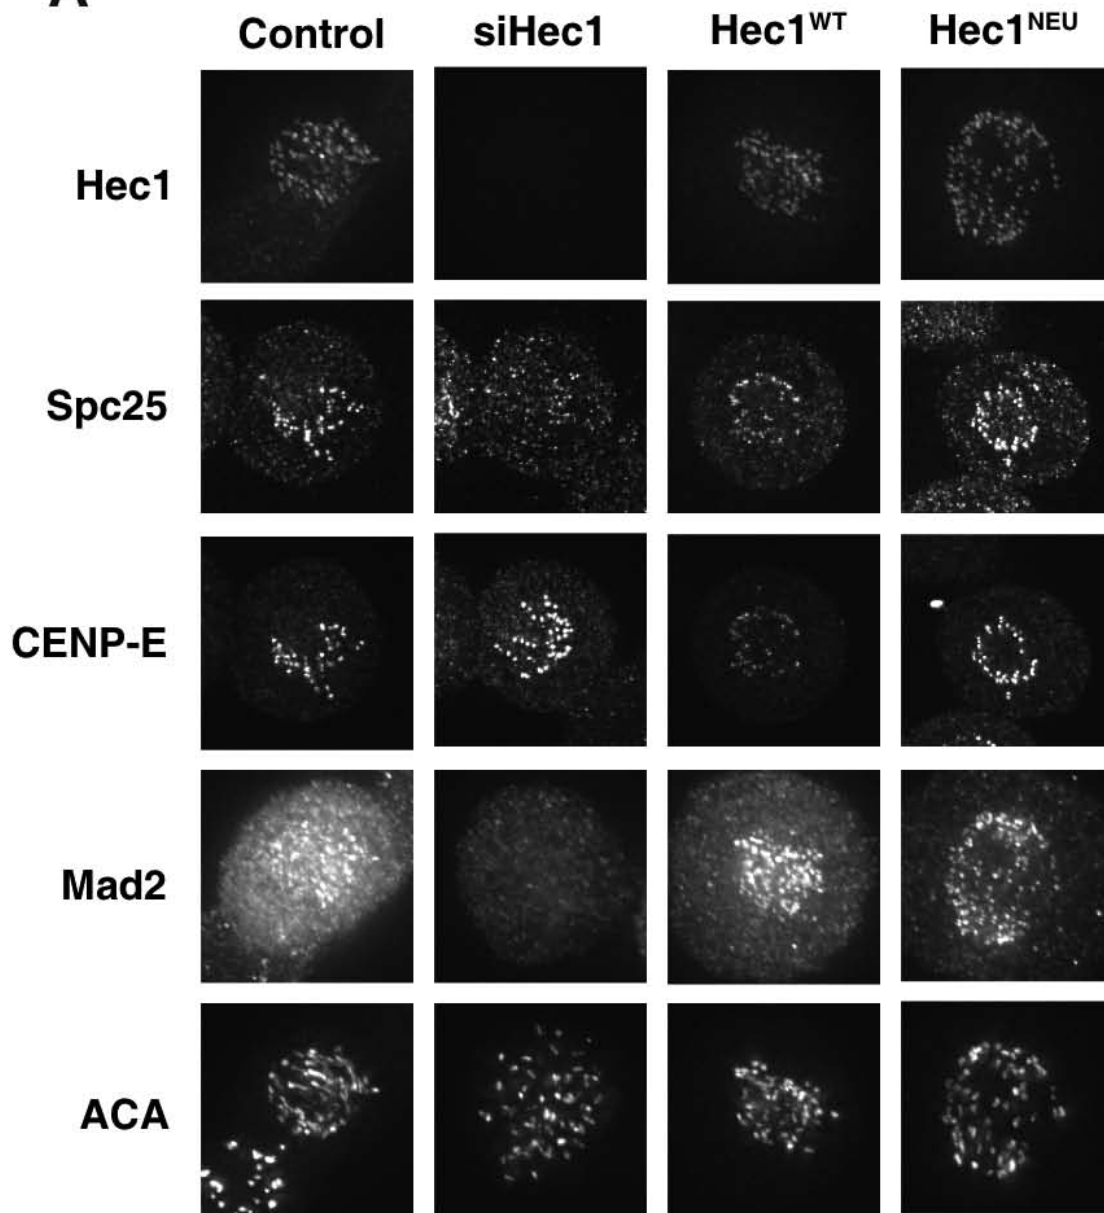**Supplemental Figure 6**

**A**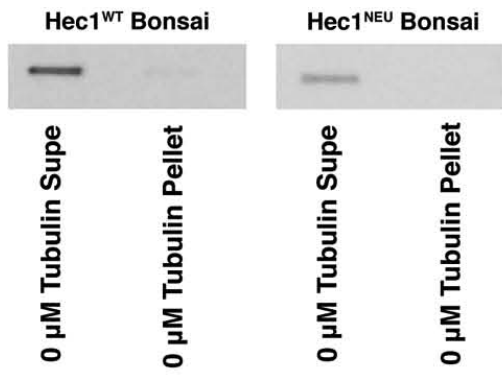**B**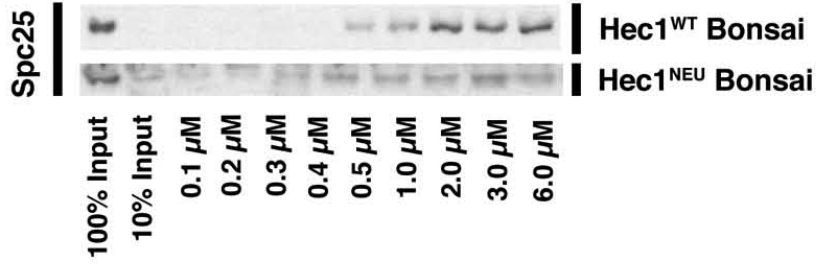

Supplemental Figure 7
